# Supplementary material
Source: HighWire-hosted journal article supplement (https://bmjopenquality.bmj.com/highwire/filestream/143047/field_highwire_adjunct_files/2/bmjoq-2021-001624supp003_data_supplement.pdf)
Supplement: bmjoq-2021-001624supp003_data_supplement.pdf [file bmjoq-2021-001624supp003_data_supplement.pdf]

Chart Review Results Review Snapshot **Triage** Advance Care Planning **ERS Narrator** Trauma Code Procedure Narrator Stroke Narrator STEMI Narrator **Sepsis Narrator** Disposition ERS Notes MAR Orders

Sepsis Narrator Refresh Tx Team

Expand All Collapse All Not Scanned

Favorites

Staff (1) Arrived

Sepsis Documentation

Vitals/I&O

Nursing Assessments

Existing LDAs (0)

IVs/Lines

Airways

Tubes

Drains

Wounds

Additional LDA Documentation

Quick Notes

Event Log Patient Summary Orders

QuickBar

VS

BP Heart Rate

MAP (mmHg) Resp

Temp SpO2

O2 Device: None (Room air), Nasal cannula, Simple mask, Face tent, Venturi mask, Aerosol mask, Bag valve mask (Ambu), Bi-PAP, Blow-by, CPAP, ETT, High flow nasal cannula, Non-rebreather mask, Partial rebreather mask, T-Piece, Trach mask, Trached-to-vent, Transtracheal catheter, Other (Comment)

O2 Flow Rate (L/min) FiO2 (%)

ETCO2 (mmHg)

File

**No End Event Filed**  
There is no end event for this sepsis. Consider filing an end event.  
Load Past Sepsis File End Event

Show: Deleted Status Changes Staff Flowsheets/Assessments

| Time | Event                       | Details                                                        | User |
|------|-----------------------------|----------------------------------------------------------------|------|
|      | Sepsis Documentation Start  |                                                                | X    |
|      | Staff Arrived               |                                                                | X    |
|      | Sepsis Huddle Documentation | Sepsis Huddle - Huddle Outcome/Alert Start: On Sepsis Protocol |      |

Alerts (5)

Overdue

- Fluid bolus needs to be ordered - Contact Provider
- Sepsis Lactate needs to be ordered - Contact provider
- Broad spectrum antibiotics need to be ordered - contact provider
- Sepsis blood culture needs to be ordered - Contact provider
- Sepsis fluid bolus evaluation needed - contact provider

MAR

Acknowledged Orders (3)

Acknowledge All Orders

New Orders

Modified Orders

Discontinued Orders
